# Supplementary material for: Estimates of the ongoing need for social distancing and control measures post-“lockdown” from trajectories of COVID-19 cases and mortality
Source: PubMed Central journal article supplement — Eur Respir J. 2020 Jul 23;56(1):2001483. doi: 10.1183/13993003.01483-2020 (PMC7263071; doi:10.1183/13993003.01483-2020), 2020-07-23
Supplement: ERJ-01483-2020.Shareable.pdf [file ERJ-01483-2020.Shareable.pdf]

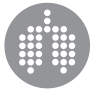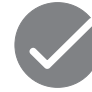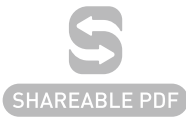

# Estimates of the ongoing need for social distancing and control measures post-“lockdown” from trajectories of COVID-19 cases and mortality

Mike Lonergan and James D. Chalmers

**Affiliation:** Division of Molecular and Clinical Medicine, School of Medicine, University of Dundee, Dundee, UK.

**Correspondence:** Mike Lonergan, Division of Molecular and Clinical Medicine, University of Dundee, Ninewells Hospital and Medical School, Dundee, DD1 9SY, UK. E-mail: m.lonergan@dundee.ac.uk

 @ERSpublications

**Data from multiple countries show that current restrictions on behaviour barely contain the spread of COVID-19. Resuming 20% of the currently excluded contact between individuals looks sufficient to restart the epidemic’s progression in many countries.** <https://bit.ly/2B4dIOw>

**Cite this article as:** Lonergan M, Chalmers JD. Estimates of the ongoing need for social distancing and control measures post-“lockdown” from trajectories of COVID-19 cases and mortality. *Eur Respir J* 2020; 56: 2001483 [<https://doi.org/10.1183/13993003.01483-2020>].

This single-page version can be shared freely online.

**ABSTRACT** By 21 May 2020, severe acute respiratory syndrome-coronavirus-2 (SARS-CoV-2) had caused more than 5 million cases of coronavirus 2019 (COVID-19) across more than 200 countries. Most countries with significant outbreaks have introduced social distancing or “lockdown” measures to reduce viral transmission. So the key question now is when, how and to what extent these measures can be lifted.

Publicly available data on daily numbers of newly confirmed cases and mortality were used to fit regression models estimating trajectories, doubling times and the reproduction number ( $R_0$ ) of the disease, before and under the control measures. These data ran up to 21 May 2020, and were sufficient for analysis in 89 countries.

The estimates of  $R_0$  before lockdown based on these data were broadly consistent with those previously published: between 2.0 and 3.7 in the countries with the largest number of cases available for analysis (USA, Italy, Spain, France and UK). There was little evidence to suggest that the restrictions had reduced  $R$  far below 1 in many places, with France having the most rapid reductions:  $R_0$  0.76 (95% CI 0.72–0.82) based on cases, and 0.77 (95% CI 0.73–0.80) based on mortality.

Intermittent lockdown has been proposed as a means of controlling the outbreak while allowing periods of increased freedom and economic activity. These data suggest that few countries could have even 1 week per month unrestricted without seeing resurgence of the epidemic. Similarly, restoring 20% of the activity that has been prevented by the lockdowns looks difficult to reconcile with preventing the resurgence of the disease in most countries.
